# Supplementary material for: Strongly tricolor-emitting carbon dots synthesized by a combined aging–annealing route and their bio-application
Source: Royal Society of Chemistry journal article supplement (doi:10.1039/c7ra10471e), 2017-01-01
Supplement: c7ra10471e1.pdf [file c7ra10471e1.pdf]

# **Strongly Tricolor-emitting Carbon Dots Synthesized by the Combined Aging-annealing Route and Their Bio- Application**

(Supporting Information)

*Ya Peng , Xinyan Zhou, Nannan Zheng, Lingyu Wang, Xingping Zhou\**

College of Chemistry, Chemical Engineering and Biotechnology, Donghu University

Shanghai 201620, China

\*Corresponding author. E-mail: xpzhou@dhu.edu.cn.

Telephone: +86-21-67792657. Fax: +86-21-67792657.

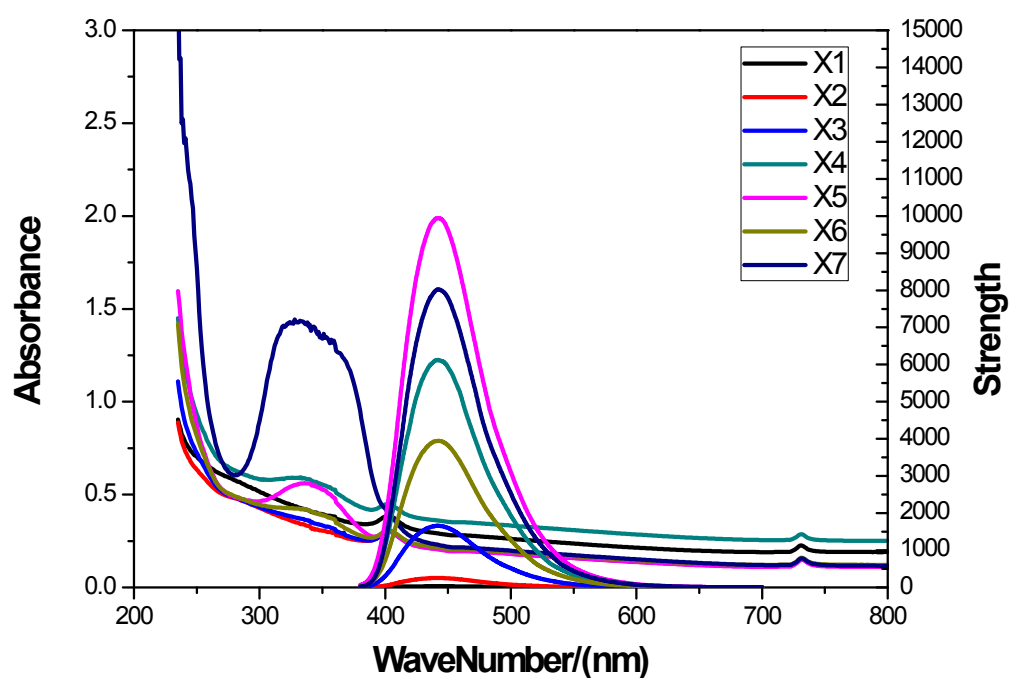

Figure S1. UV absorbance and fluorescence spectra of the synthesized FCNs under the different addition amounts.

Table S1

Effect of different addition amounts on the fluorescence intensity of the CA-N-FCNs

|                                | X1                                                                                  | X2                                                                                  | X3                                                                                  | X4                                                                                  | X5                                                                                    | X6                                                                                    | X7                                                                                    |
|--------------------------------|-------------------------------------------------------------------------------------|-------------------------------------------------------------------------------------|-------------------------------------------------------------------------------------|-------------------------------------------------------------------------------------|---------------------------------------------------------------------------------------|---------------------------------------------------------------------------------------|---------------------------------------------------------------------------------------|
| 365 nm<br>Ultraviolet<br>light |  |  |  |  |  |  |  |

Table S2

Effect of aging time on the fluorescence intensity of the CA-N-FCNs

|                          | 0.5h                                                                                | 1h                                                                                  | 1.5h                                                                                | 2h                                                                                    | 2.5h                                                                                  | 3h                                                                                    |
|--------------------------|-------------------------------------------------------------------------------------|-------------------------------------------------------------------------------------|-------------------------------------------------------------------------------------|---------------------------------------------------------------------------------------|---------------------------------------------------------------------------------------|---------------------------------------------------------------------------------------|
| 365 nm Ultraviolet light |  |  |  |  |  |  |

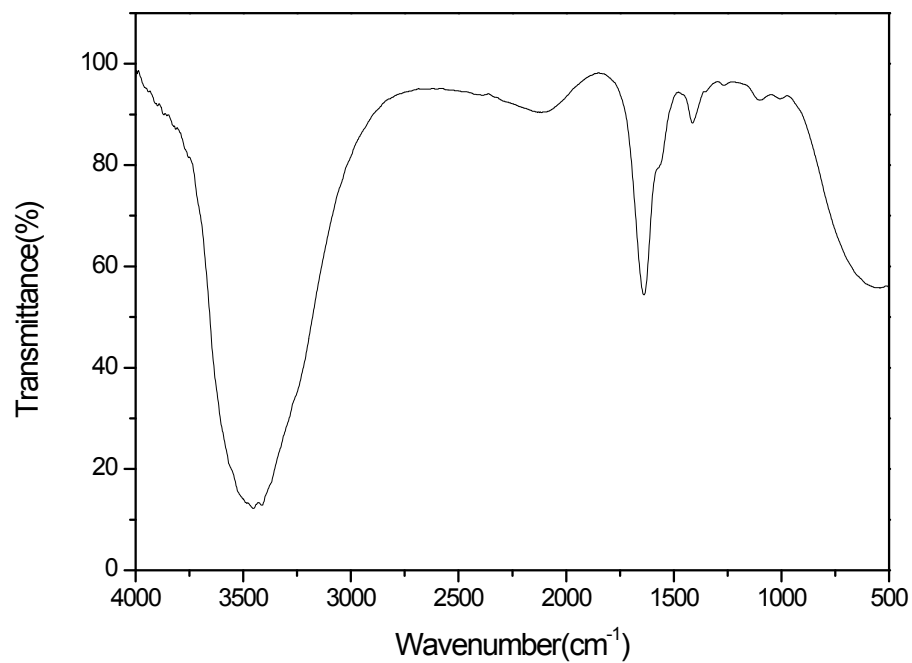

Figure S2. FT-IR spectrum of the synthesized FCNs under the optimal conditions.
